# Supplementary material for: TACC3 promotes colorectal cancer tumourigenesis and correlates with poor prognosis
Source: PubMed Central journal article supplement (PMC5173103; doi:10.18632/oncotarget.9628), 2016-05-26
Supplement: oncotarget-07-41885-s001.pdf [file oncotarget-07-41885-s001.pdf]

## TACC3 promotes colorectal cancer tumourigenesis and correlates with poor prognosis

### SUPPLEMENTARY FIGURE AND TABLE

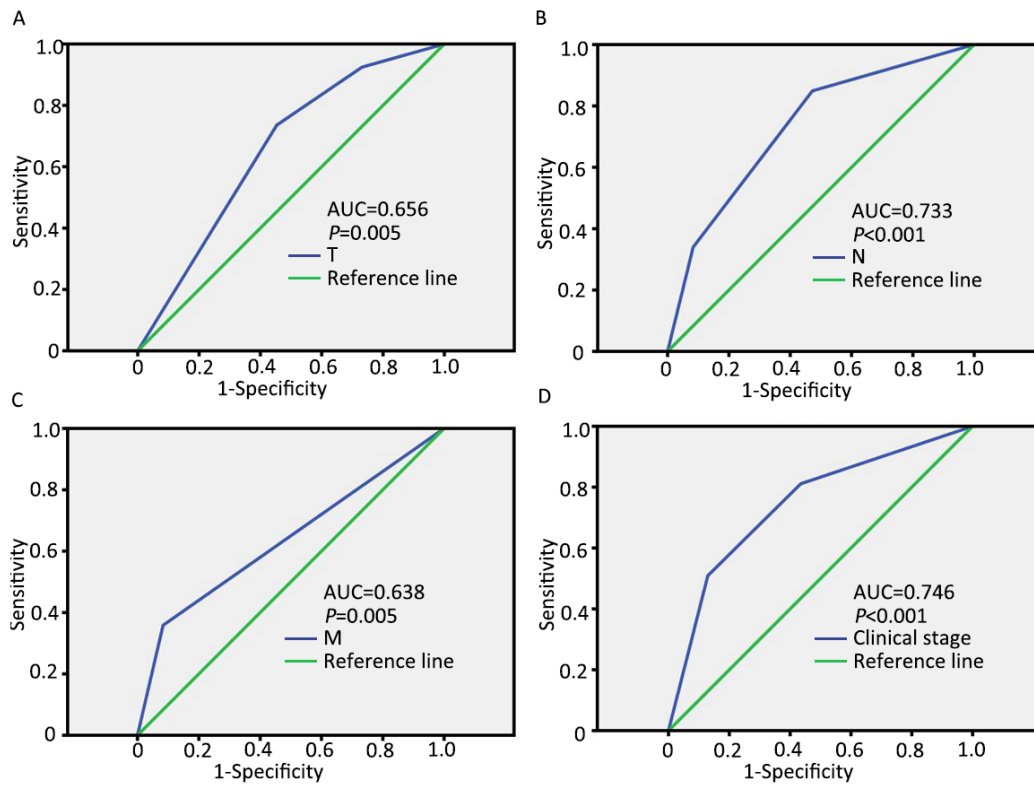

**Supplementary Figure S1: ROC-2 analysis.** The sensitivity and 1-specificity for several variables in CRC patients, including T classification **A**, N classification **B**, M classification **C**, and clinical stage **D**, were plotted. AUC, area under the curve.

Supplementary Table S1: Clinicopathologic characteristics of CRC patients (n=161)

| Characteristics                   | No.(%)    |
|-----------------------------------|-----------|
| Age (years) <sup>b</sup>          | 53.3±11.8 |
| <b>Gender</b>                     |           |
| Female                            | 71(44.1)  |
| Male                              | 90(55.9)  |
| <b>Clinical Stage</b>             |           |
| I+II                              | 65(40.4)  |
| III                               | 69(42.9)  |
| IV                                | 27 (16.7) |
| <b>T classification</b>           |           |
| T1+T2                             | 33(20.5)  |
| T3                                | 40(24.8)  |
| T4                                | 88(54.7)  |
| <b>N classification</b>           |           |
| N0                                | 71(44.1)  |
| N+                                | 90(55.9)  |
| <b>M classification</b>           |           |
| M0                                | 133(82.6) |
| M1                                | 28(17.4)  |
| <b>Pathologic Differentiation</b> |           |
| Well                              | 3(1.9)    |
| Moderately                        | 150(93.2) |
| Poorly                            | 8(4.9)    |
| <b>Histological Types</b>         |           |
| Non-mucinous adenocarcinoma       | 147(91.3) |
| mucinous adenocarcinoma           | 14(8.7)   |
| <b>Location</b>                   |           |
| Colon                             | 93(57.8)  |
| Rectal                            | 68(42.2)  |
| <b>Vital status</b>               |           |
| Alive                             | 108(67.1) |
| Death                             | 53(32.9)  |
